# Supplementary material for: High-performance Ni–Ce1−xZrxO2 nanoparticles for biogas reforming: enhanced CO2 activation and stability
Source: Royal Society of Chemistry journal article supplement (doi:10.1039/d1se01298c), 2021-01-01
Supplement: d1se01298c1.pdf [file d1se01298c1.pdf]

## High-performance Ni-Ce<sub>1-x</sub>Zr<sub>x</sub>O<sub>2</sub> nanoparticle for biogas reforming: enhance CO<sub>2</sub> activation and stability

Zhige Zhang<sup>1\*</sup>, Guofeng Zhao<sup>2\*</sup>, Han Bing<sup>1</sup>, Jiawei Zhong<sup>1#</sup>, Jun Xie<sup>1#</sup>

<sup>1</sup> Institute of Biomass Engineering, South China Agricultural University; Key Laboratory of Energy Plants Resource and Utilization, Ministry of Agriculture and Rural Affairs; Guangdong Engineering Technology Research Center of Agricultural and Forestry Biomass, South China Agricultural University, Guangzhou 510642, P.R. China.

<sup>2</sup> Shanghai Key Laboratory of Green Chemistry and Chemical Processes, School of Chemistry and Molecular Engineering, East China Normal University, Shanghai 200062, P.R. China.

\*Z. Zhang, and G. Zhao contributed equally to this paper.

#Corresponding authors: Jiawei Zhong (zhongjiaweiv@scau.edu.cn), Jun Xie (xiejun@scau.edu.cn).

**Table S1.** Metal amount of Ni-Ce<sub>1-x</sub>Zr<sub>x</sub>O<sub>2</sub>/SiC-foam catalysts.

| Catalyst                                                                 | Loading (wt%) |     |     |        |     |     |
|--------------------------------------------------------------------------|---------------|-----|-----|--------|-----|-----|
|                                                                          | Nominal       |     |     | Actual |     |     |
|                                                                          | Ni            | Ce  | Zr  | Ni     | Ce  | Zr  |
| 4wt%Ni/10wt%Ce <sub>0.6</sub> Zr <sub>0.4</sub> O <sub>2</sub> /SiC-foam | 3.1           | 5.5 | 2.3 | 3.0    | 3.9 | 0.8 |

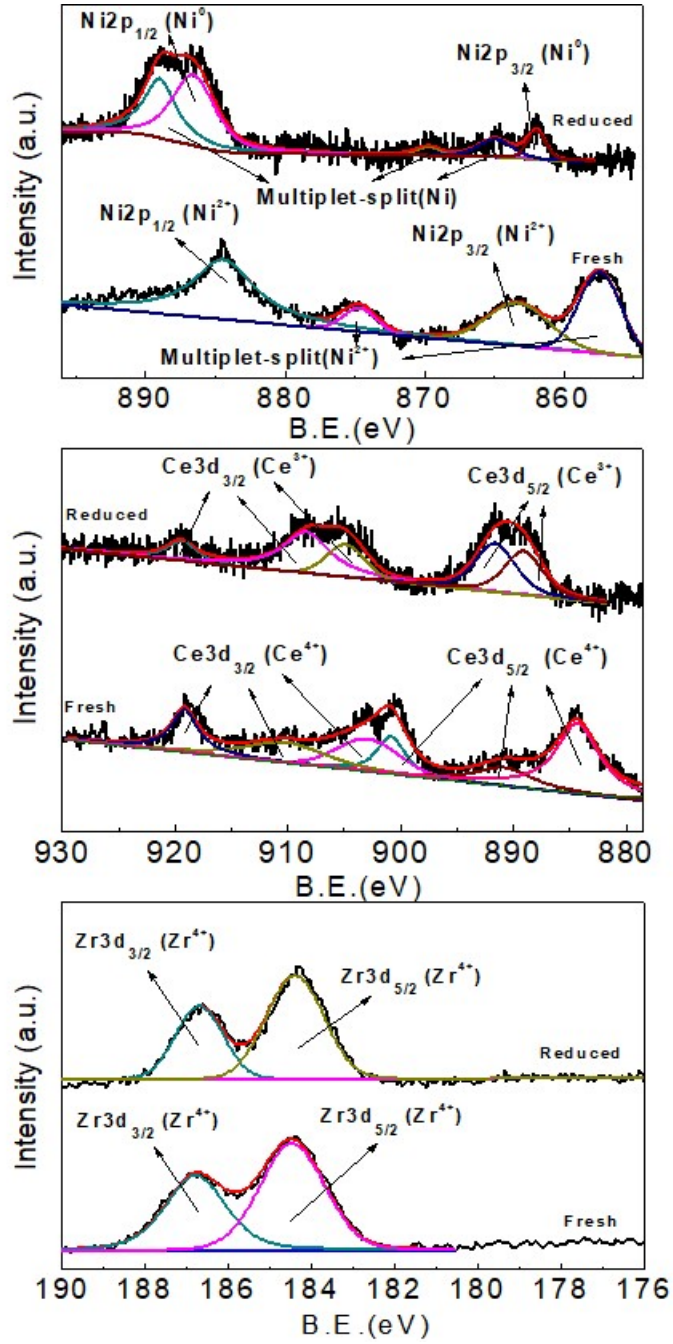

**Fig. S1.** XPS spectra of (a) Ni and (b) Ce (c) Zr elements for fresh and reduced Ni/Ce<sub>1-x</sub>Zr<sub>0x</sub>O<sub>2</sub>/SiC-F.

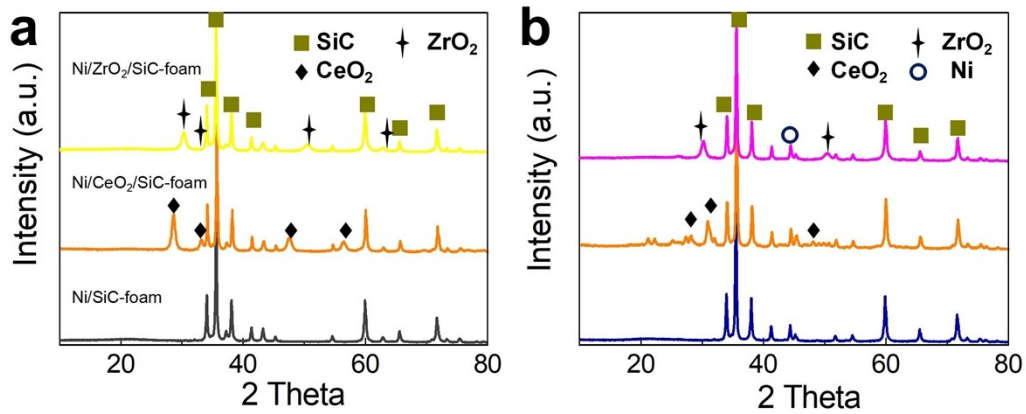

**Fig. S2.** XRD patterns of (a) fresh and (b) reduced Ni/CeO<sub>2</sub>/SiC-foam, Ni/ZrO<sub>2</sub>/SiC-foam and Ni/SiC-foam.

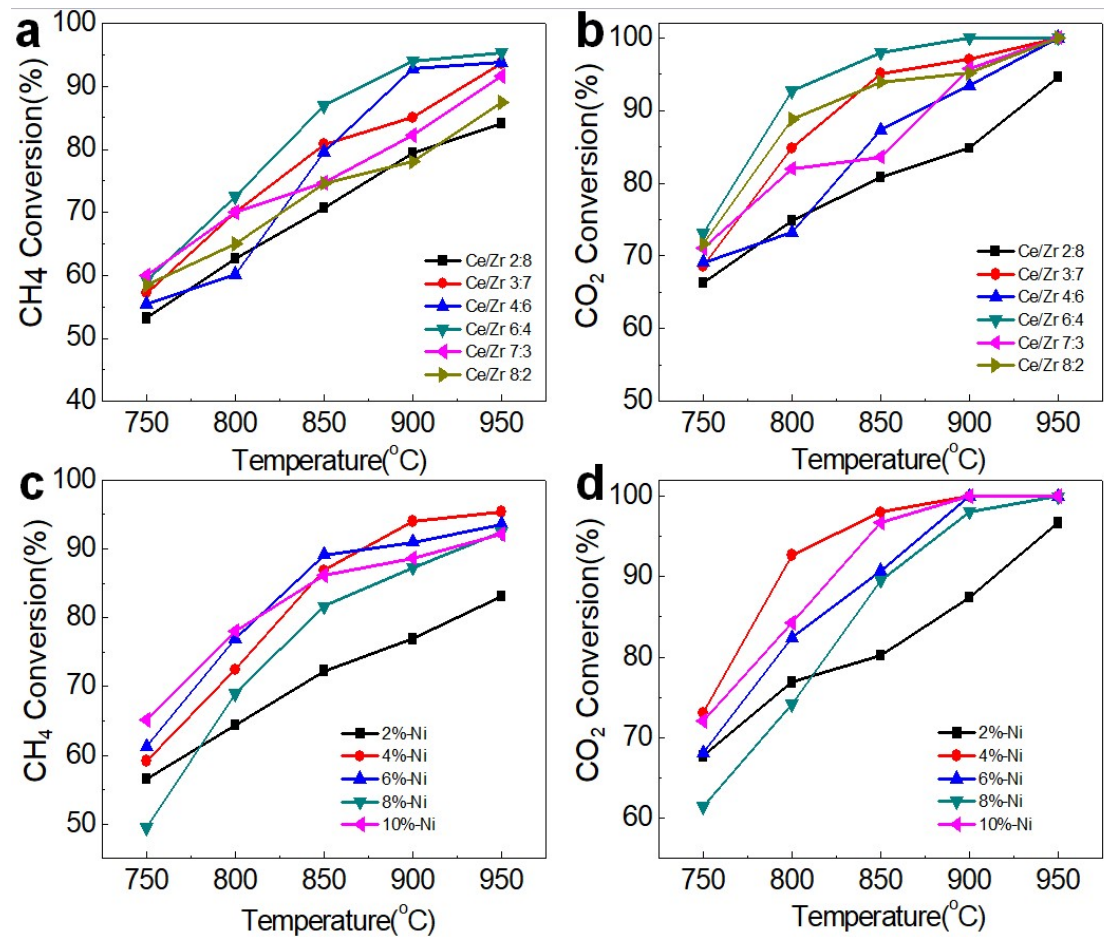

**Fig. S3.** (a-b) CH<sub>4</sub> and CO<sub>2</sub> conversions rates on Ni/Ce<sub>1-x</sub>Zr<sub>x</sub>O<sub>2</sub>/SiC-foam with different Ce/Zr molar ratio. (c-d) CH<sub>4</sub> and CO<sub>2</sub> conversions on Ni/Ce<sub>0.6</sub>Zr<sub>0.4</sub>O<sub>2</sub>/SiC-foam with different Ni loadings. Reaction condition: CH<sub>4</sub>/CO<sub>2</sub> molar ratio of 1/1,

GHSV of 24000 mL g<sup>-1</sup> h<sup>-1</sup>, atmospheric pressure.

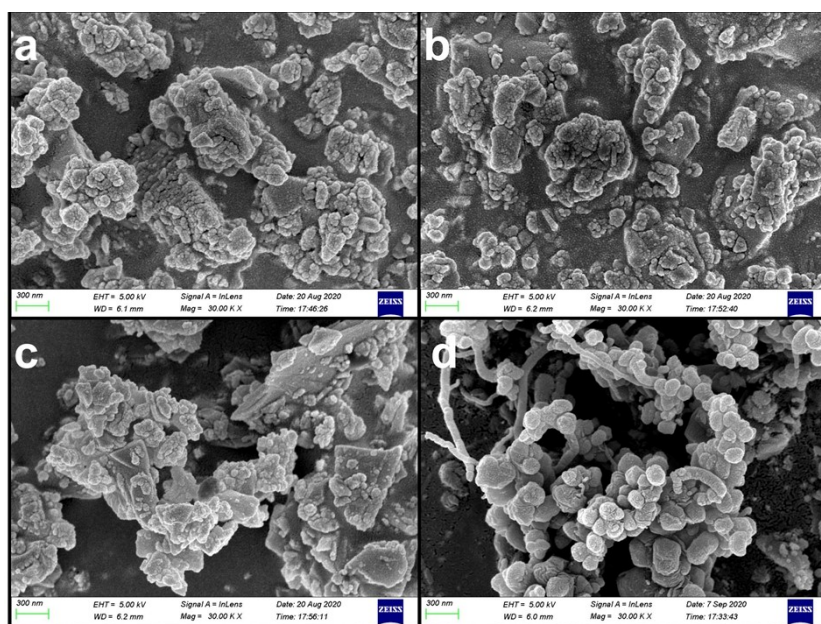

**Fig. S4.** SEM images of (a) Ni/Ce<sub>0.6</sub>Zr<sub>0.4</sub>O<sub>2</sub>/SiC-foam, (b) Ni/CeO<sub>2</sub>/SiC-foam, (c) Ni/ZrO<sub>2</sub>/SiC-foam and (d) Ni/SiC-foam after catalytic activity evaluation.

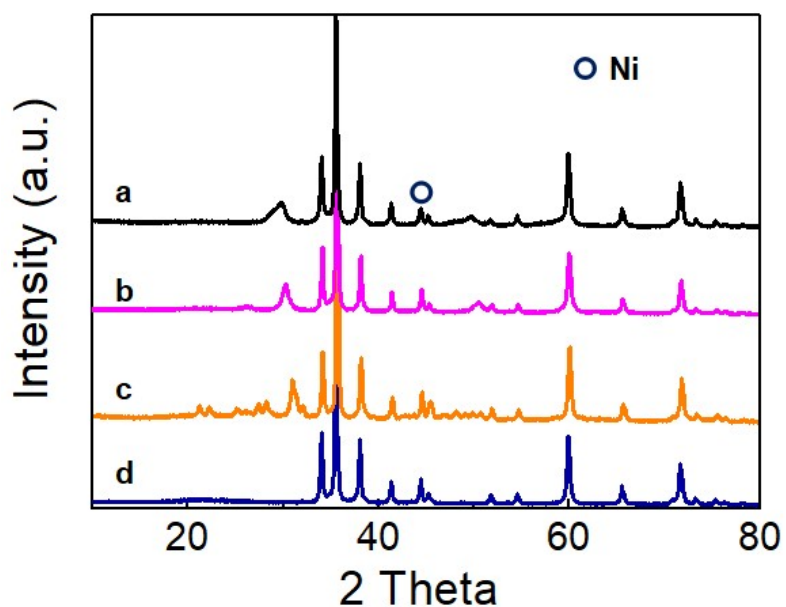

**Fig. S5.** XRD patterns of (a) Ni/Ce<sub>0.6</sub>Zr<sub>0.4</sub>O<sub>2</sub>/SiC-foam, (b) Ni/ZrO<sub>2</sub>/SiC-foam, (c) Ni/CeO<sub>2</sub>/SiC-foam and (d) Ni/SiC-foam after catalytic activity evaluation.

**Table S2.** Average particle size of Ni NPs of Ni/Ce<sub>0.6</sub>Zr<sub>0.4</sub>O<sub>2</sub>/SiC-foam, Ni/ZrO<sub>2</sub>/SiC-foam, Ni/CeO<sub>2</sub>/SiC-foam and Ni/SiC-foam after catalytic activity evaluation.

| Catalyst                                                        | Ni size <sup>b</sup> (nm) |
|-----------------------------------------------------------------|---------------------------|
| Ni/Ce <sub>0.6</sub> Zr <sub>0.4</sub> O <sub>2</sub> /SiC-foam | 11                        |
| Ni/CeO <sub>2</sub> /SiC-foam                                   | 23                        |
| Ni/ZrO <sub>2</sub> /SiC-foam                                   | 24                        |
| Ni/SiC-foam                                                     | 32                        |
